# Supplementary material for: Poly-l-lysine derivative-coated black phosphorus as a nanoplatform for photothermal chemotherapy to enhance anti-tumor efficiency
Source: Royal Society of Chemistry journal article supplement (doi:10.1039/d1tb02456f), 2022-01-01
Supplement: d1tb02456f1.pdf [file d1tb02456f1.pdf]

Supporting information

*for*

**Polylysine derivative coated black phosphorus as a nanoplatform for  
photothermal-chemotherapy to enhance anti-tumor efficiency**

Anning Li<sup>a</sup>, Siqu Wang<sup>a</sup>, Zhiqiang Zhang<sup>b</sup>, Na Xu<sup>a</sup>, Guixia Ling<sup>a</sup>, Peng Zhang<sup>a\*</sup>

<sup>a</sup> Wuya College of Innovation, Shenyang Pharmaceutical University, Shenyang,

Liaoning 110016, PR China

<sup>b</sup> School of Pharmacy, Xiamen Medical College, Xiamen 361023, PR China

\* Corresponding Author

Peng Zhang, E-mail: zhangpengspu@163.com

$^1\text{H-NMR}$  data of PLL-SS- $\text{NH}_2$  and its intermediate:

**PLL.**  $^1\text{H-NMR}$  (600MHz,  $\text{DMSO-}d_6$ ):  $\delta$  8.84 (s, 1H, NH), 8.36 (s, 2H,  $\text{NH}_2$ ), 3.79 (t, 1H, CH), 3.10 (s, 2H,  $\text{CH}_2$ ), 1.76 (s, 2H,  $\text{CH}_2$ ), 1.46 (s, 2H,  $\text{CH}_2$ ), 1.36 (d, 2H,  $\text{CH}_2$ ).

**PLL-SA.**  $^1\text{H-NMR}$  (600MHz,  $\text{DMSO-}d_6$ ):  $\delta$  8.02 (d, 1H, NH), 7.82 (s, 1H, NH), 4.12 (dd, 1H, CH), 2.99 (d, 2H,  $\text{CH}_2$ ), 2.40 (s, 2H,  $\text{CH}_2$ ), 2.37 (d, 2H,  $\text{CH}_2$ ), 1.63 (t, 2H,  $\text{CH}_2$ ), 1.35 (m, 2H,  $\text{CH}_2$ ), 1.24 (m, 2H,  $\text{CH}_2$ ).

**PLL-SS- $\text{NH}_2$ .**  $^1\text{H-NMR}$  (600MHz,  $\text{D}_2\text{O}$ ): 8.49 (d, 1H, NH), 7.02 (d, 1H, NH), 4.14 (s, 1H, CH), 3.50 (t, 1H, CH), 3.17 (s, 2H,  $\text{CH}_2$ ), 2.98 (t, 2H,  $\text{CH}_2$ ), 2.88 (s, 2H,  $\text{CH}_2$ ), 2.85 (q, 2H,  $\text{CH}_2$ ), 2.56 (s, 2H,  $\text{CH}_2$ ), 2.49 (m, 2H,  $\text{CH}_2$ ), 1.67 (d, 2H,  $\text{CH}_2$ ), 1.50 (s, 2H,  $\text{CH}_2$ ), 1.35 (s, 2H,  $\text{CH}_2$ ).

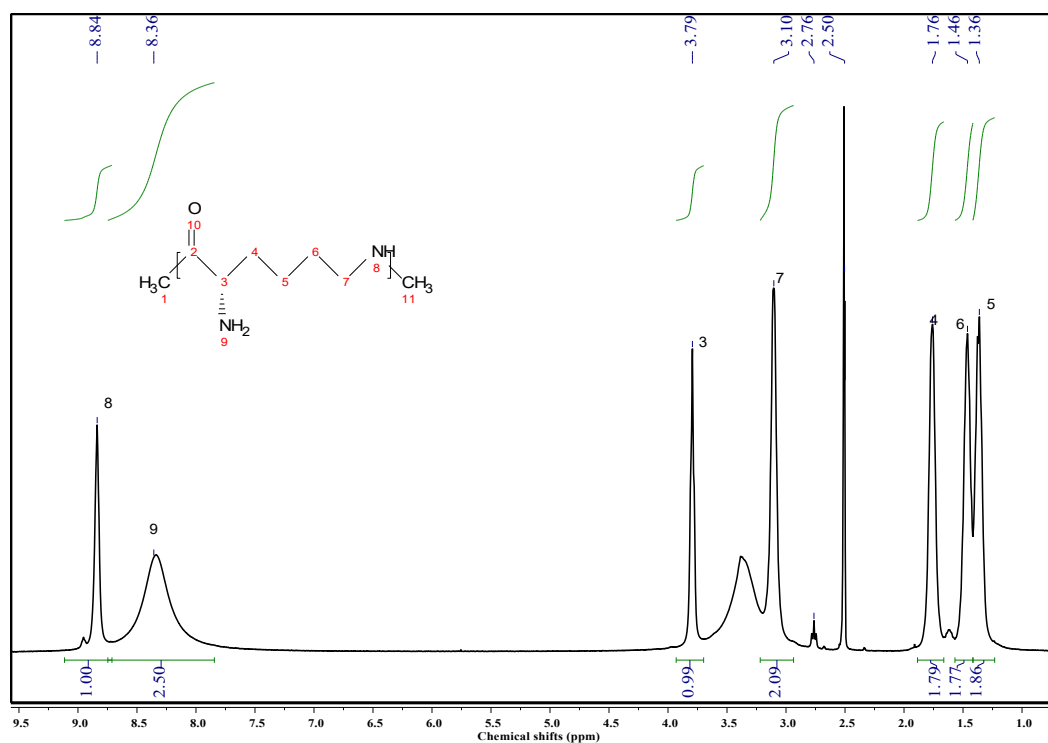

**Fig. S1.**  $^1\text{H-NMR}$  spectrum of PLL.

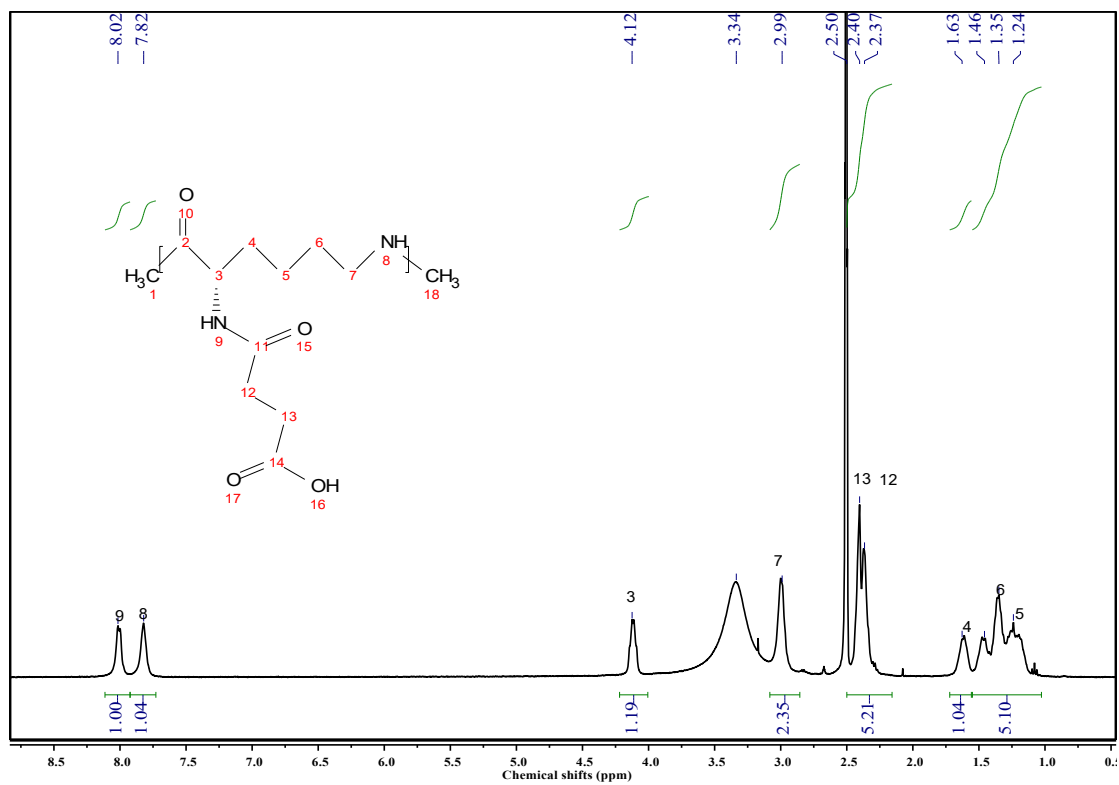

**Fig. S2.** <sup>1</sup>H-NMR spectrum of PLL-SA.

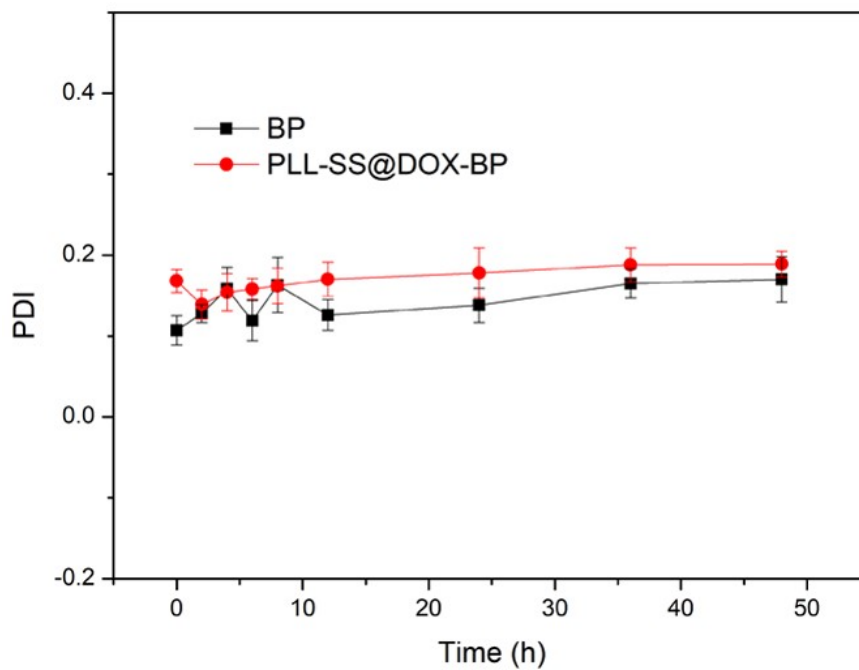

**Fig. S3.** The PDI changes of BP nanosheets and PLL-SS@DOX-BP nanocomposites at ambient temperature in darkness during 48 h.

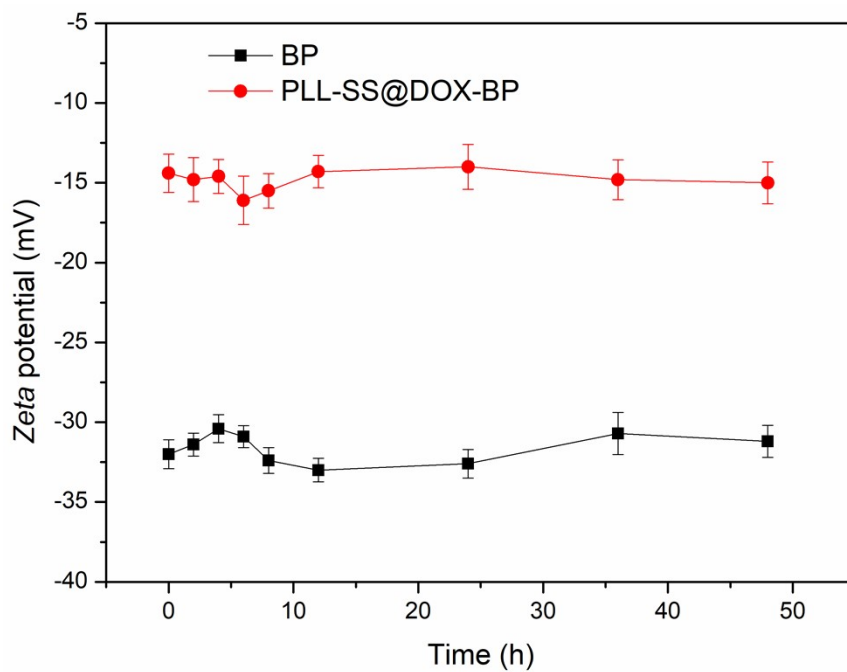

**Fig. S4.** The *zeta*-potential changes of BP nanosheets and PLL-SS@DOX-BP nanocomposites at ambient temperature in darkness during 48 h.

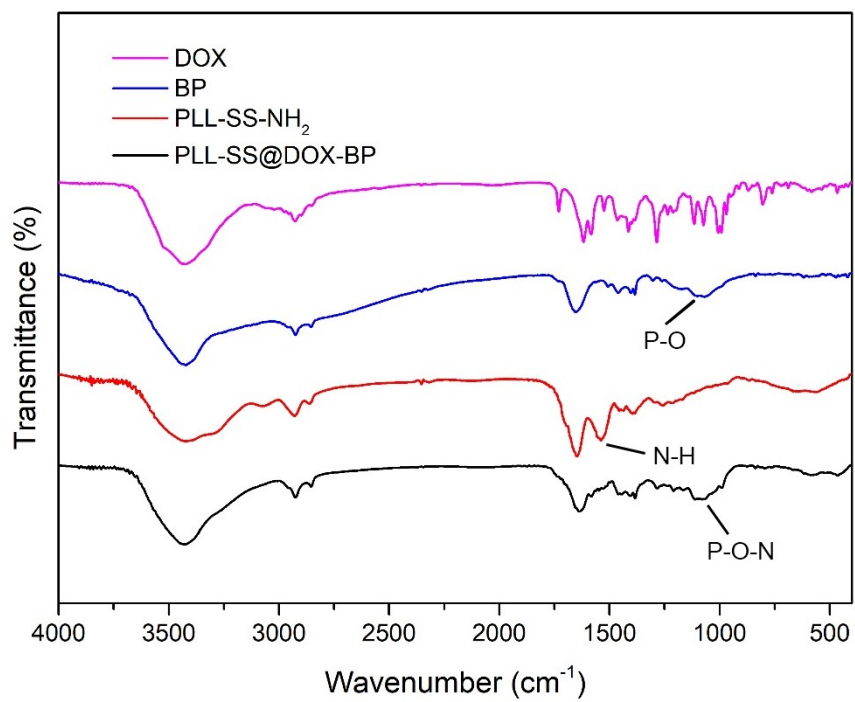

**Fig. S5.** FT-IR spectra of different preparations.

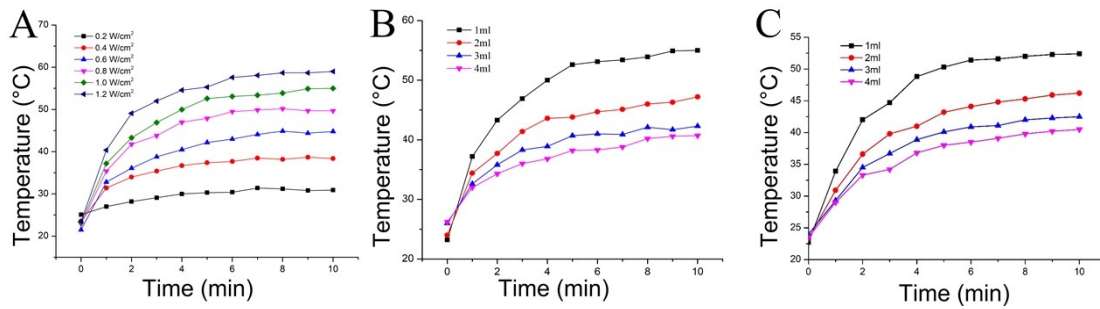

**Fig. S6.** Photothermal performance of BP nanosheets with different power density of laser irradiation (A); Photothermal performance of BP nanosheets of different concentrations (B); Photothermal performance of PLL-SS@DOX-BP nanocomposites of different concentrations (C).

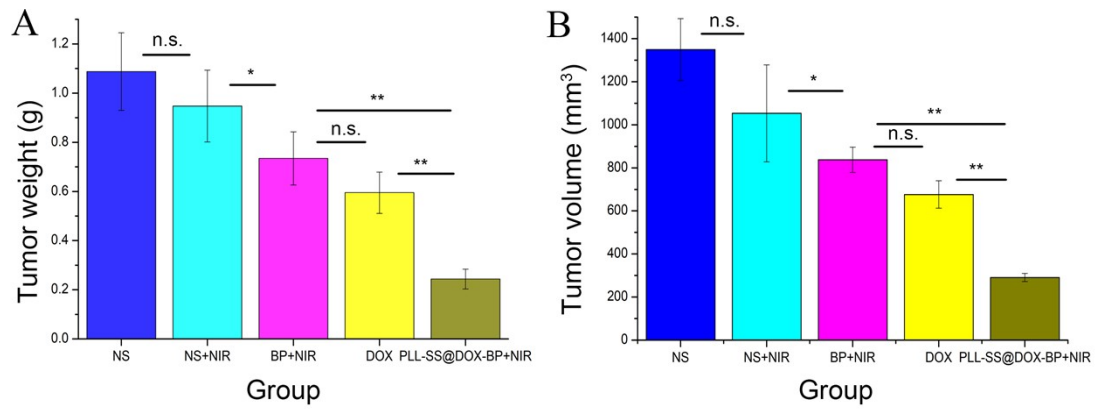

**Fig. S7.** Tumor weight of different treatment groups (A); Tumor volume of different treatment groups (B).



**Table S1.** Size distribution, PDI and *zeta*-potential of BP nanosheets and PLL-SS@DOX-BP nanocomposites.

| Item          | Size (nm)    | PDI           | <i>Zeta</i> -potential (mV) |
|---------------|--------------|---------------|-----------------------------|
| BP            | 83.34 ± 1.25 | 0.107 ± 0.068 | -32.0 ± 0.902               |
| PLL-SS@DOX-BP | 187 ± 1.097  | 0.168 ± 0.014 | -14.8 ± 0.153               |

**Table S2.** IC<sub>50</sub> values of different treatments on 4T1 cells measured *via* CCK-8 assay.

| Group                  | IC <sub>50</sub> (µg·mL <sup>-1</sup> ) |
|------------------------|-----------------------------------------|
| PLL-SS-NH <sub>2</sub> | -                                       |
| BP                     | -                                       |
| PLL-SS@DOX-BP          | 1.749 ± 0.079                           |
| BP + NIR               | -                                       |
| PLL-SS@DOX-BP + NIR    | 0.954 ± 0.021                           |
| DOX                    | 0.776 ± 0.018                           |

**Table S3.** *In vivo* pharmacodynamics parameters of each groups.

| Group         | Tumor weight (g) | Tumor volume (mm <sup>3</sup> ) | Tumor inhibition rate (%) |
|---------------|------------------|---------------------------------|---------------------------|
| NS            | 1.09 ± 0.16      | 1349.32 ± 143.88                | -                         |
| NS + NIR      | 0.95 ± 0.15      | 1053.26 ± 225.00                | 12.91 ± 13.43             |
| BP + NIR      | 0.73 ± 0.11      | 838.08 ± 58.71                  | 32.48 ± 9.94              |
| DOX           | 0.59 ± 0.08      | 676.58 ± 63.60                  | 45.30 ± 7.73              |
| PLL-SS@DOX-BP | 0.24 ± 0.04      | 290.85 ± 19.01                  | 77.59 ± 3.69              |
